# Supplementary material for: Primary producers may ameliorate impacts of daytime CO2 addition in a coastal marine ecosystem
Source: PeerJ. 2018 May 9;6:e4739. doi: 10.7717/peerj.4739 (PMC5949060; doi:10.7717/peerj.4739)
Supplement: Supplemental Information 1 — This file contains the following tables: Table S1. Cover of sessile invertebrates and macrophytes in tide pools. Table S2. Carbonate inputs and parameters from tide pools calculated using seacarb. Table S3. Calculated values for net community production and net ecosystem calcification. Table S4. Ranges in physical attributes and chemical parameters measured in ambient tide pools. [file peerj-06-4739-s001.xlsx]

## Sheet: Table S1
Table S1. Cover of sessile invertebrates (IN) and macrophytes (seaweeds [SW] and surfgrass [SG]) in tide pools (m2).
Pool	Total	Bare rock	Mytilus	Barnacles	Anthopleura	Sponge	Mastocarpus	Endocladia	Cladophora	Corallina	Encrusting	Hildenbrandia	Mazzaella	Petrocelis form of	Prionitis	Gelidium	Bossiella	Mazzaella	Phyllospadix
	(Pool SA)		californianus (IN)	(IN)	xanthogrammica (IN)	(IN)	pappilatus (SW)	muricata (SW)	columbiana (SW)	vancouveriensis (SW)	corallines (SW)	rubra (SW)	flaccida (SW)	Mastocarpus (SW)	lyallii (SW)	coulteri (SW)	californica (SW)	splendens (SW)	torreyi (SG)
1	0.23	0.06	0.02	0	0.04	0	0.005	0	0	0.005	0.0025	0.12	0	0	0.02	0	0	0	0
2	0.22	0.02	0.0025	0	0	0	0	0	0	0	0.01	0.09	0	0	0.02	0.0025	0	0	0
3	0.34	0.06	0.0025	0	0.02	0	0	0	0	0.05	0	0.06	0	0.03	0.05	0.01	0	0	0.05
4	0.16	0.09	0.005	0	0	0	0.02	0	0.0025	0	0	0.04	0	0	0.05	0.02	0	0	0
5	0.33	0.27	0.01	0	0	0	0.01	0	0	0	0	0.02	0	0	0.025	0	0	0.05	0
6	0.22	0.09	0.005	0	0	0	0.01	0	0	0.005	0.005	0.02	0	0	0.04	0	0	0	0
7	0.16	0.03	0.08	0	0	0.0025	0.0025	0	0	0	0	0.005	0	0.03	0.01	0	0	0	0
8	0.38	0.12	0.11	0.001	0	0	0	0	0	0.0025	0.0025	0.05	0	0	0.27	0	0	0.02	0
9	1	0.48	0.19	0	0	0	0	0	0	0.03	0.05	0.06	0.01	0	0.4	0	0	0	0.02
10	0.43	0.17	0.01	0.01	0.03	0	0.0025	0.0025	0	0.02	0	0.05	0	0	0	0.02	0.03	0	0.24

## Sheet: Table S2
Table S2. Carbonate inputs and parameters from tide pools calculated using seacarb.
Day	Time	Pool	Treatment	Salinity	DO	Pool temp	pH	PAR	N+N	PO43-	NH4+	TA	Wind	CO2	pCO2 in situ	HCO3	CO3	DIC	Ωarag
				(‰)	(mg/L)	(°C)	(total scale)	(μmol/m2/s)	(μmol/L)	(μmol/L)	(μmol/L)	(μmol/kg)	(m/s)	(μmol/kg)	(μatm)	(μmol/kg)	(μmol/kg)	(μmol/kg)
1	0	1	Control	35.8	8.22	11.1	7.793	168.948	10.3	0.934	5.709	2228.88	3.88403	30.9769	738.177	2022.05	81.7474	2134.77	1.23589
1	0	2	+CO2	34.6	8.22	11	7.855	168.948	8.82	1.21	39.917	2238.8	3.95779	27.028	637.475	2010.16	90.7802	2127.97	1.38048
1	0	3	+CO2	37	8.33	11	7.919	168.948	18.1	2.42	119.137	2350.41	3.36696	23.5177	562.151	2063.23	113.805	2200.56	1.7099
1	0	4	+CO2	37.1	8.43	11	7.873	168.948	12.8	2.41	127.291	2276.75	3.57669	25.5682	611.873	2020.53	100.694	2146.79	1.51113
1	0	5	+CO2	36.9	9.32	11.7	7.879	168.948	11.3	1.8	31.347	2178.52	3.4843	23.6168	577.549	1923.78	99.5777	2046.97	1.49733
1	0	6	Control	37	8.11	11.6	7.738	168.948	10.6	1.36	32.088	2192.76	3.18292	34.1012	831.135	2002.29	74.5664	2110.96	1.12126
1	0	7	Control	36.9	8.57	11.1	7.873	168.948	6.74	0.769	5.421	2226.31	4.172	25.0127	599.417	1977.19	98.2282	2100.43	1.47709
1	0	8	Control	37.1	9.55	11.5	7.901	168.948	7.75	1.34	57.244	2147.8	3.3949	22.1266	537.662	1886.65	101.939	2010.72	1.53231
1	0	9	+CO2	36.9	12.58	11.4	8.056	168.948	6.23	0.84	10.243	2187.23	3.66685	15.0836	364.953	1830.71	140.207	1986	2.10951
1	0	10	Control	37.1	8.39	11.2	7.924	168.948	11	1.33	29.195	2230.04	3.64263	21.8515	526.044	1950.56	109.96	2082.37	1.65157
1	1.5	1	Control	37	8.99	11.6	7.95	781.324	6.28	0.936	9.247	2226.77	3.719	20.1545	491.462	1929.27	117.285	2066.71	1.76271
1	1.5	2	+CO2	36.7	9.43	11.7	8	781.324	11.3	2.09	54.952	2236.41	3.35727	17.7474	433.415	1906.9	129.727	2054.38	1.95342
1	1.5	3	+CO2	37.1	10.57	11.9	8.063	781.324	21.6	2.31	179.409	2454.67	4.31654	16.3738	403.032	2047.87	163.263	2227.51	2.45548
1	1.5	4	+CO2	37.4	10.26	12.1	8.102	781.324	11.5	1.78	170.017	2290.67	5.3846	13.5842	337.131	1872.07	165.734	2051.39	2.48853
1	1.5	5	+CO2	33.6	15.74	13.3	8.336	781.324	12.1	2.55	27.731	2075.15	4.52814	6.40203	161.583	1513.23	221.276	1740.9	3.39544
1	1.5	6	Control	37.2	11.65	12.7	8.141	781.324	18.6	2.42	34.746	2138.09	4.21745	11.17	282.16	1706.42	168.348	1885.94	2.53389
1	1.5	7	Control	37	10.93	11.9	8.03	781.324	4.59	0.766	8.61	2202.65	3.75588	15.9917	393.736	1854.37	137.167	2007.53	2.06239
1	1.5	8	Control	37.5	13.74	12.7	8.247	781.324	12.7	1.59	71.408	2161.72	2.98548	8.35096	211.38	1632.42	207.179	1847.95	3.11143
1	1.5	9	+CO2	36.9	18.81	12.8	8.445	781.324	4.42	0.816	8.665	2156.87	4.16381	4.65338	117.77	1432.84	284.394	1721.89	4.28701
1	1.5	10	Control	37.1	9.49	12.1	8.054	781.324	12.4	1.55	35.326	2222.28	4.27929	15.0369	372.585	1851.84	145.889	2012.77	2.1943
1	3	1	Control	37	8.86	13.3	7.747	1662.75	7.9	1.23	16.0115	2199.46	4.8325	31.9022	820.285	1993.64	80.9418	2106.48	1.22101
1	3	2	+CO2	37.1	11.53	14.1	8.078	1662.75	15.9	2.59	78.0805	2193.75	4.90142	13.0833	344.806	1785.96	160.243	1959.28	2.42131
1	3	3	+CO2	37.6	13.4	14.1	8.24	1662.75	40.4	2.32	182.276	2712.35	4.35491	10.3015	272.511	2051.3	271.164	2332.77	4.0801
1	3	4	+CO2	37.4	12.29	14.9	8.247	1662.75	15.8	1.89	177.639	2306.3	3.98275	8.32145	225.238	1713.24	236.074	1957.63	3.56399
1	3	5	+CO2	37.3	16.98	18.3	8.548	1662.75	7.34	1.88	53.245	1952.5	4.13214	2.41357	72.1558	1073.38	336.403	1412.19	5.12499
1	3	6	Control	38	16.08	16	8.415	1662.75	12.3	1.78	35.696	2000.56	3.5223	4.1076	115.341	1283.18	275.592	1562.88	4.15187
1	3	7	Control	37.1	13.83	16.1	8.068	1662.75	5.29	0.882	11.111	2172.59	4.60675	12.5131	350.557	1751.13	166.371	1930.01	2.52308
1	3	8	Control	37.8	16.59	16.3	8.381	1662.75	11.4	2.29	116.598	2101.3	3.47909	4.77948	135.229	1388.12	277.496	1670.39	4.19023
1	3	9	+CO2	37.8	23.87	16.8	8.662	1662.75	3.6	1.01	9.999	2046.28	3.27159	1.81772	52.174	1019.45	396.265	1417.53	5.99339
1	3	10	Control	38.3	12.87	14.3	7.994	1662.75	14.2	2.02	64.909	2180.72	3.73576	15.9812	427.023	1822.91	139.893	1978.78	2.09592
1	4.5	1	Control	37.5	9.08	15	7.654	1618.09	6.97	1.2	16.168	2156.2	5.37379	37.4962	1018.86	1977.32	70.0525	2084.87	1.05675
1	4.5	2	+CO2	37.2	13.45	16.8	8.149	1618.09	16.4	2.75	71.274	2175.69	5.15474	9.77792	279.593	1675.23	196.896	1881.91	2.99182
1	4.5	3	+CO2	37.2	15.23	17.1	8.307	1618.09	77.4	3.17	172.064	2397.73	4.64959	6.74877	194.967	1678.12	288.771	1973.63	4.3833
1	4.5	4	+CO2	37.4	14.31	17.6	8.354	1618.09	28.2	2.23	172.136	2408.93	4.77737	5.77995	169.485	1620.42	317.219	1943.42	4.81908
1	4.5	5	+CO2	36.8	16.03	22.3	8.679	1618.09	8.17	1.65	29.228	1638.51	5.26352	1.06612	35.5105	696.476	340.688	1038.23	5.27135
1	4.5	6	Control	37.9	17.26	18.6	8.449	1618.09	17.7	1.83	35.986	1861.85	4.64028	3.10418	93.8843	1110.55	283.705	1397.36	4.30873
1	4.5	7	Control	37.7	15.16	19.5	8.157	1618.09	7.93	1.21	16.456	2093.73	5.12159	8.39755	259.973	1560.42	208.953	1777.77	3.1901
1	4.5	8	Control	39.1	19.25	18	8.423	1618.09	25.6	4.05	108.734	1999.92	3.62363	3.65944	109.488	1225.54	295.28	1524.48	4.43902
1	4.5	9	+CO2	37.7	24.19	20.1	8.825	1618.09	3.03	1	9.751	1933.83	3.83374	0.817003	25.7423	716.872	458.995	1176.68	7.01134
1	4.5	10	Control	37.6	10.35	15.1	8.013	1618.09	17.3	2.34	92.58	2147.83	4.30947	14.6787	400.6	1776.2	145.137	1936.02	2.18638
1	6	1	Control	38.1	8.11	16.9	7.531	696.563	5.25	1.17	19.231	2174.07	3.42246	48.6081	1401.34	2024.35	58.754	2131.71	0.887204
1	6	2	+CO2	37.2	14.54	18.4	8.213	696.563	12.4	2.92	80.996	2141.42	3.9347	7.59138	227.458	1563.29	226.848	1797.73	3.45962
1	6	3	+CO2	37.7	14.33	19.3	8.378	696.563	32.1	1.34	172.303	2335.3	2.82008	4.87682	150.267	1502.46	333.278	1840.61	5.0793
1	6	4	+CO2	37.5	13.51	19.1	8.439	696.563	39.4	2.53	182.843	2640.34	1.80269	4.61196	141.399	1629.24	413.769	2047.63	6.29708
1	6	5	+CO2	39.5	14.77	22.5	8.64	696.563	17.7	2.61	59.295	1629.2	3.41799	1.14679	38.8875	698.069	330.778	1029.99	5.02628
1	6	6	Control	37.9	15.7	19.4	8.514	696.563	13.5	1.79	44.331	1786.99	3.71267	2.32279	71.8358	981.954	300.118	1284.4	4.56977
1	6	7	Control	37.7	15.17	21.2	8.245	696.563	0.909	0.581	18.891	2055.01	4.00883	6.00782	194.979	1418.47	248.567	1673.04	3.81289
1	6	8	Control	37.2	15.19	21	8.521	696.563	9.41	2.12	115.244	1926.47	2.73439	2.34813	75.6339	1039.54	338.425	1380.31	5.20286
1	6	9	+CO2	37.5	22.46	22.3	8.992	696.563	1.95	0.812	11.883	1889.23	2.80294	0.374849	12.5093	504.689	511.518	1016.58	7.89374
1	6	10	Control	37.5	11.74	15.7	8.232	696.563	9.9	1.87	137.661	2046.67	2.60438	7.42396	206.234	1507.96	208.591	1723.98	3.14742
2	0	1	+CO2	36.5	8.7	11.7	7.824	927.799	11.5	0.928	3.74706	2242.15	6.31481	28.1318	686.146	2012.34	90.8391	2131.31	1.36958
2	0	2	Control	37.2	9.65	11.9	7.999	927.799	14.2	1.09	9.04118	2226.79	6.50294	17.5543	432.25	1895.55	130.602	2043.71	1.96348
2	0	3	Control	37.1	9.38	11.2	8.028	927.799	17	1.11	17.6882	2225.7	5.73478	16.6174	399.879	1883.77	134.722	2035.11	2.02431
2	0	4	Control	37	10.3	11.5	8.057	927.799	13.1	0.96	8.74706	2223.95	5.47438	15.227	369.971	1859.27	143.823	2018.32	2.16211
2	0	5	Control	37.1	12.15	13.4	8.294	927.799	13.3	1.44	17.5118	2204.04	6.18294	7.29595	188.432	1613.14	232.877	1853.31	3.50855
2	0	6	+CO2	37.1	11.54	12.1	8.317	927.799	15.7	1.38	11.1	2188.68	5.40285	7.01376	174.615	1591.6	233.939	1832.55	3.50048
2	0	7	+CO2	36.8	9.74	12.4	7.972	927.799	9.4	0.838	7.45294	2230.69	5.75042	18.6427	465.87	1912.63	125.729	2057	1.89407
2	0	8	+CO2	37.2	12.71	12.5	8.216	927.799	14.9	1.42	10.1588	2233.49	6.42136	9.53526	239.503	1724.1	201.066	1934.7	3.02325
2	0	9	Control	37.2	11.38	12.6	8.121	927.799	12.4	1.05	4.62941	2230.95	6.22168	12.3654	311.634	1801.41	169.601	1983.38	2.55001
2	0	10	+CO2	37.4	8.69	12.3	8.017	927.799	14.3	1.23	11.4529	2224.53	6.14196	16.4935	411.598	1876.36	137.223	2030.08	2.06295
2	1.5	1	+CO2	37.8	7.89	12	7.73	1531.14	7.79	0.839	6.57059	2203.4	5.91285	34.3061	851.171	2009.36	76.0728	2119.74	1.13843
2	1.5	2	Control	37.5	12.13	13.7	8.179	1531.14	17.5	1.24	10.3941	2188.74	7.10831	9.93369	259.375	1700.97	191.841	1902.75	2.88671
2	1.5	3	Control	37.8	12.31	13.2	8.105	1531.14	45.1	1.9	75.6294	2175.98	6.20566	12.2673	316.021	1754.4	164.936	1931.6	2.47377
2	1.5	4	Control	37.8	12.3	13.9	8.194	1531.14	19.3	1.2	14.5706	2163.15	6.40981	9.31133	245.012	1661.44	196.652	1867.41	2.95494
2	1.5	5	Control	37.5	17.07	18	8.609	1531.14	16.5	1.92	12.7471	2058.19	6.12408	2.09961	62.3031	1068.89	382.802	1453.79	5.81884
2	1.5	6	+CO2	37.4	16.37	15.6	8.478	1531.14	21.2	1.84	21.6882	2114.54	5.01393	3.66435	101.345	1306.16	315.36	1625.18	4.76561
2	1.5	7	+CO2	37.3	12.75	15.1	8.109	1531.14	9.41	0.955	8.33529	2185.83	6.04435	11.5703	314.91	1740.73	175.568	1927.87	2.65329
2	1.5	8	+CO2	37.5	15.73	15.9	8.552	1531.14	12.9	1.4	27.3353	2158.53	5.9434	2.91284	81.3185	1240.39	359.84	1603.15	5.43879
2	1.5	9	Control	37.6	20.93	16.4	8.382	1531.14	10.2	1.01	10.1	2175.77	5.85473	4.9518	140.33	1442.48	288.633	1736.07	4.36668
2	1.5	10	+CO2	38.6	14.08	16	8.111	1531.14	14.4	1.31	23.4529	2177.39	5.14506	10.9619	308.854	1707.03	184.429	1902.42	2.76638
2	3	1	+CO2	37.4	8.47	14	7.707	1712.2	15.1	1.96	10.425	2190.96	5.88863	34.3016	903.741	1994.82	76.701	2105.82	1.15515
2	3	2	Control	37.5	14.1	16.3	8.205	1712.2	25.1	1.89	16.328	2156.58	6.60651	8.38985	236.431	1616.92	212.195	1837.51	3.21973
2	3	3	Control	37.2	13.77	17.3	8.174	1712.2	64.8	2.53	83.2685	2094.72	6.38932	8.608	249.816	1580.47	200.77	1789.85	3.05377
2	3	4	Control	37.9	15.97	16.5	8.319	1712.2	27.6	1.55	25.618	2056.91	5.64872	5.60074	159.47	1417.42	247.96	1670.98	3.74404
2	3	5	Control	37.8	18.44	21.2	8.489	1712.2	18.4	2.32	14.7555	1893.74	5.4226	2.51685	81.7682	1043.56	322.087	1368.17	4.93339
2	3	6	+CO2	37.7	18.07	18.4	8.527	1712.2	29	2.58	23.1465	1890.4	5.35628	2.46458	74.0782	1049.88	317.868	1370.21	4.82827
2	3	7	+CO2	37.4	14.97	18.5	8.122	1712.2	14.9	1.81	10.5755	2125.02	5.74707	9.69972	292.248	1628.88	194.493	1833.07	2.95677
2	3	8	+CO2	38.6	21.62	19.5	8.713	1712.2	22.2	2.37	22.792	2072.83	5.71056	1.36739	42.4271	916.567	445.484	1363.42	6.78083
2	3	9	Control	37.6	24.41	20.1	8.84	1712.2	8.58	1.6	6.573	2050.75	5.23894	0.830303	26.1361	753.25	497.314	1251.4	7.6066
2	3	10	+CO2	38.4	14	16	8.138	1712.2	27.4	3.07	40.362	2125.94	5.56826	9.9097	279.055	1641.18	188.299	1839.39	2.82645
2	4.5	1	+CO2	37	10.07	17.1	7.726	1428.34	15.4	1.85	16.1605	2152.49	4.4406	29.6837	855.801	1932.03	86.5475	2048.26	1.31695
2	4.5	2	Control	37.3	15.85	18.5	8.314	1428.34	29.8	2.12	22.5685	2125.93	5.11377	5.55376	166.929	1446.87	266.255	1718.67	4.06025
2	4.5	3	Control	37.7	15.67	18.9	8.274	1428.34	77.5	2.72	100.786	1996.75	6.12035	5.74681	175.063	1381.04	237.295	1624.08	3.61311
2	4.5	4	Control	37.5	18.28	19.3	8.459	1428.34	30.7	1.4	30.8845	1994.56	5.4375	3.18366	97.9802	1180.22	313.995	1497.39	4.79288
2	4.5	5	Control	38.3	16.65	22.7	8.528	1428.34	22.8	2.42	13.909	2013.24	5.4904	2.20863	74.8818	1036.71	374.336	1413.25	5.74064
2	4.5	6	+CO2	37.6	17.76	20	8.569	1428.34	34.3	2.63	21.0285	1884.21	5.80183	2.00698	63.0278	973.96	343.81	1319.78	5.25407
2	4.5	7	+CO2	37.6	15.65	21.8	8.209	1428.34	7.41	1.14	12.4885	1978	4.94873	6.30982	208.005	1387.66	228.472	1622.44	3.51431
2	4.5	8	+CO2	38	18.68	20.8	8.725	1428.34	30.2	3.27	49.09	1974.7	6.3923	1.16386	37.4684	825.664	435.2	1262.03	6.64097
2	4.5	9	Control	37.5	24.53	22.6	8.869	1428.34	3.1	1.03	7.145	1993.95	5.97916	0.640384	21.5591	654.255	506.966	1161.86	7.82256
2	4.5	10	+CO2	38.3	11.67	15.5	8.166	1428.34	27.3	2.81	55.3765	2043.17	6.39006	8.9398	247.761	1559.11	186.408	1754.46	2.79881
2	6	1	+CO2	37.7	8.43	18.7	7.485	736.287	7.55	1.09	18.6294	2134.73	5.51759	51.2324	1552.59	1993.67	55.3604	2100.26	0.84195
2	6	2	Control	37.2	15.38	19.5	8.283	736.287	14.6	1.16	30.1	2083.15	4.57173	5.78197	178.675	1432.79	254.59	1693.16	3.89603
2	6	3	Control	38.5	12.55	19.2	8.379	736.287	49.3	1.35	63.1	2084.41	5.52728	4.25295	131.324	1318.02	297.631	1619.91	4.5041
2	6	4	Control	38.5	16.82	18.7	8.452	736.287	27.3	1.13	31.1	1915.25	5.26986	3.11627	94.9587	1131.13	297.414	1431.66	4.48945
2	6	5	Control	39.2	13.97	21.8	8.494	736.287	18.2	1.78	12.4529	1907.18	4.08744	2.38016	79.1484	1019.27	334.835	1356.49	5.08425
2	6	6	+CO2	38.3	17.07	20.1	8.593	736.287	16.8	1.34	17.6294	1552.93	4.87795	1.45439	45.954	750.507	284.799	1036.76	4.33358
2	6	7	+CO2	37.7	14.66	22.7	8.184	736.287	3.42	0.686	11.6294	1766.06	4.85374	5.84671	197.469	1237.15	199.211	1442.21	3.0724
2	6	8	+CO2	37.5	18.85	21.7	8.841	736.287	15.5	1.56	15.9824	1994.45	4.37131	0.742798	24.425	698.749	491.495	1190.99	7.55575
2	6	9	Control	37.6	14.24	22.7	8.71	736.287	2.29	0.968	8.21765	1855.5	4.682	1.06876	36.0899	759.083	410.054	1170.21	6.32594
2	6	10	+CO2	38.4	11.82	17.5	8.301	736.287	19.2	2.11	66.6294	1869.62	4.22751	5.10388	150.164	1272.93	225.118	1503.16	3.39135

## Sheet: Table S3
Table S3. Calculated values for net community production and net ecosystem calcification
Pool	Day	Treatment	Time	Volume	SA	NEC	NCP	Δ DIC	Δ TA	FCO2
			(hr)	(m3)	(m2)	(mmol CaCO3 m-2 hr-1)	(mmol C m-2 hr-1)	(μmol kg-1)	(μmol kg-1)	(mmol kg-1 hr-1)
1	1	Control	5.98333	0.0209735	0.23	5.70255	-24.925	126.67	-73.1517	0.52671
2	1	+CO2	5.86667	0.0165368	0.22	8.72726	15.2303	-187.935	-133.167	-0.675612
3	1	+CO2	5.86667	0.0108079	0.34	1.53402	16.4501	-331.425	-55.3499	-0.386749
4	1	+CO2	5.81667	0.0101158	0.16	-18.6112	25.484	-65.2726	334.753	-0.385188
5	1	+CO2	5.78333	0.00509606	0.33	7.78588	18.3098	-976.612	-570.059	-0.58152
6	1	Control	5.8	0.00830065	0.22	13.798	39.695	-817.203	-414.677	-0.89045
7	1	Control	5.91667	0.00804821	0.16	8.29679	25.7156	-398.823	-190.793	-0.673914
8	1	Control	5.76667	0.0443241	0.38	28.647	103.06	-638.362	-276.887	-0.384646
9	1	+CO2	5.76667	0.0456956	1	12.3193	66.5553	-975.417	-303.941	-0.196113
10	1	Control	5.68333	0.0372606	0.43	22.8031	29.4995	-337.377	-292.395	-0.319709
1	2	+CO2	6.05	0.0209735	0.23	9.72084	-13.6987	38.0408	-126.087	1.88777
2	2	Control	5.98333	0.0165368	0.22	10.5526	34.6229	-355.879	-164.222	-0.561022
3	2	Control	5.96667	0.0108079	0.34	4.20099	14.3799	-354.27	-154.162	-0.727198
4	2	Control	5.93333	0.0101158	0.16	17.2605	40.2	-533.182	-316.684	-0.660239
5	2	Control	5.9	0.00509606	0.33	3.83643	8.28902	-437.297	-286.559	0.416428
6	2	+CO2	5.91667	0.00830065	0.22	20.9154	33.1099	-828.19	-641.222	-0.00263222
7	2	+CO2	6.03333	0.00804821	0.16	20.2538	30.2367	-599.315	-474.94	-0.625032
8	2	+CO2	5.86667	0.0443241	0.38	24.8276	129.333	-757.326	-244.131	0.123856
9	2	Control	5.85	0.0456956	1	15.5515	50.5525	-830.682	-389.232	-0.274709
10	2	+CO2	5.81667	0.0372606	0.43	30.8079	43.0402	-487.612	-404.305	-0.463552

## Sheet: Table S4
Table S4: Ranges in physical attributes and chemical parameters measured in ambient tide pools.
Pool	Temperature (°C)	DO (mg L-1)	pHT	TA (µmol kg-1)	DIC (µmol kg-1)	pCO2 (µatm)	Ωarag	Surface Area (m2)	Volume (L)
1	11.1 - 16.9	8.11 - 9.08	7.53 - 7.95	2224 - 2290	2125 - 2252	491.5 - 1491.3	0.89 - 1.76	0.23	22.5735
2	11.9 - 19.5	9.65 - 15.85	8.00 - 8.31	2138 - 2301	1750 - 2106	166.9 - 432.3	1.96 - 4.06	0.22	18.1368
3	11.2 - 19.2	9.38 - 15.67	8.03 - 8.38	2067 - 2287	1699 - 2091	131.3 - 399.9	2.02 - 4.50	0.34	12.4079
4	11.5 - 19.3	10.30 - 18.28	8.06 - 8.46	2058 - 2290	1541 - 2074	94.9 - 370.0	2.16 - 4.79	0.16	11.7158
5	13.4 - 22.7	12.15 - 18.44	8.29 - 8.61	1997 - 2274	1439 - 1914	62.3 - 188.4	3.51 - 5.82	0.33	6.69606
6	11.6 - 19.4	8.11 - 17.26	7.74 - 8.51	1849 - 2231	1351 - 2168	71.9 - 831.1	1.12 - 4.57	0.22	9.90065
7	11.1 - 21.2	8.57 - 15.17	7.87 - 8.25	2131 - 2280	1750 - 2149	195.0 - 599.4	1.48 - 3.81	0.16	9.64821
8	11.5 - 21.0	9.55 - 19.25	7.90 - 8.52	1886 - 2192	1429 - 2067	75.6 - 537.7	1.53 - 5.20	0.38	45.9241
9	12.6 - 22.7	11.38 - 24.53	8.12 - 8.87	1934 - 2319	1212 - 2054	21.6 - 311.6	2.55 - 7.82	1	47.2956
10	11.2 - 15.7	8.39 - 12.87	7.92 - 8.23	2013 - 2278	1806 - 2144	206.2 - 526.0	1.65 - 3.15	0.43	38.8606
